# Supplementary material for: Quaternary cerium(iv) containing fluorides exhibiting Ce3F16 sheets and Ce6F30 frameworks
Source: Royal Society of Chemistry journal article supplement (doi:10.1039/d0dt00616e), 2020-01-01
Supplement: d0dt00616e1.pdf [file d0dt00616e1.pdf]

Supplementary Information for

**Quaternary Cerium(IV) Containing Fluorides Exhibiting  
Ce<sub>3</sub>F<sub>16</sub> Sheets and Ce<sub>6</sub>F<sub>30</sub> Frameworks**

Gyanendra B. Ayer, Vladislav V. Klepov, Kristen A. Pace, and Hans-Conrad zur Loye\*

Department of Chemistry and Biochemistry, University of South Carolina, 631 Sumter  
Street, Columbia, SC, United States

\*e-mail: [zurloye@mailbox.sc.edu](mailto:zurloye@mailbox.sc.edu)

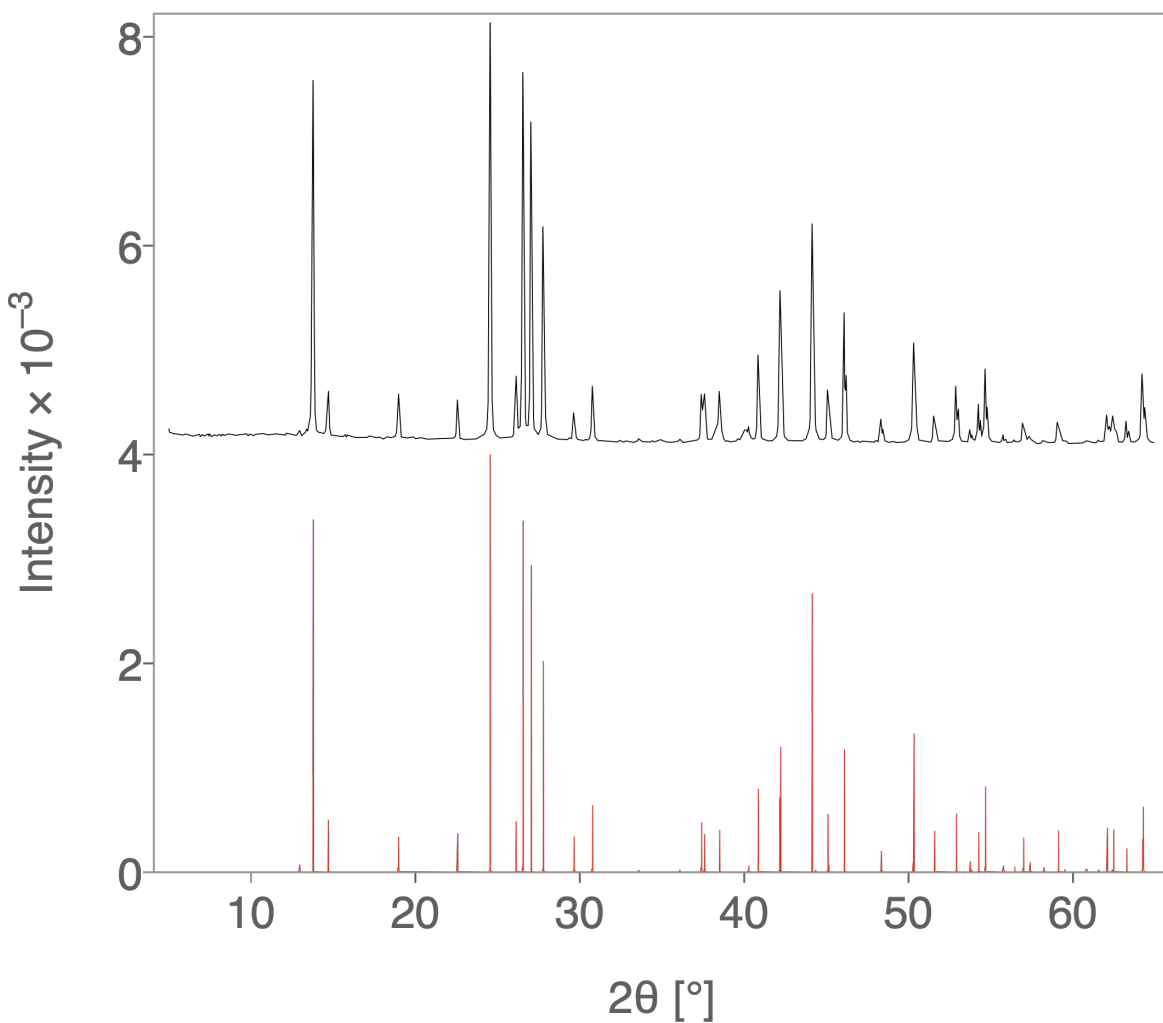

Figure S1. Experimental and calculated powder patterns of  $\text{Cs}_2\text{NiCe}_3\text{F}_{16}$  indicated by the black and red lines respectively. The preferred orientation effects (plate-like crystal morphology along (001) planes) were taken into account for the calculated pattern to bring the intensities on the same scale. The refined unit cell parameters from PXRD are  $a = 7.875(1)$ ,  $c = 12.844(1)$  Å and agree well with the parameters from single crystal X-ray diffraction,  $a = 7.8687(2)$ ,  $c = 12.8302(3)$  Å.

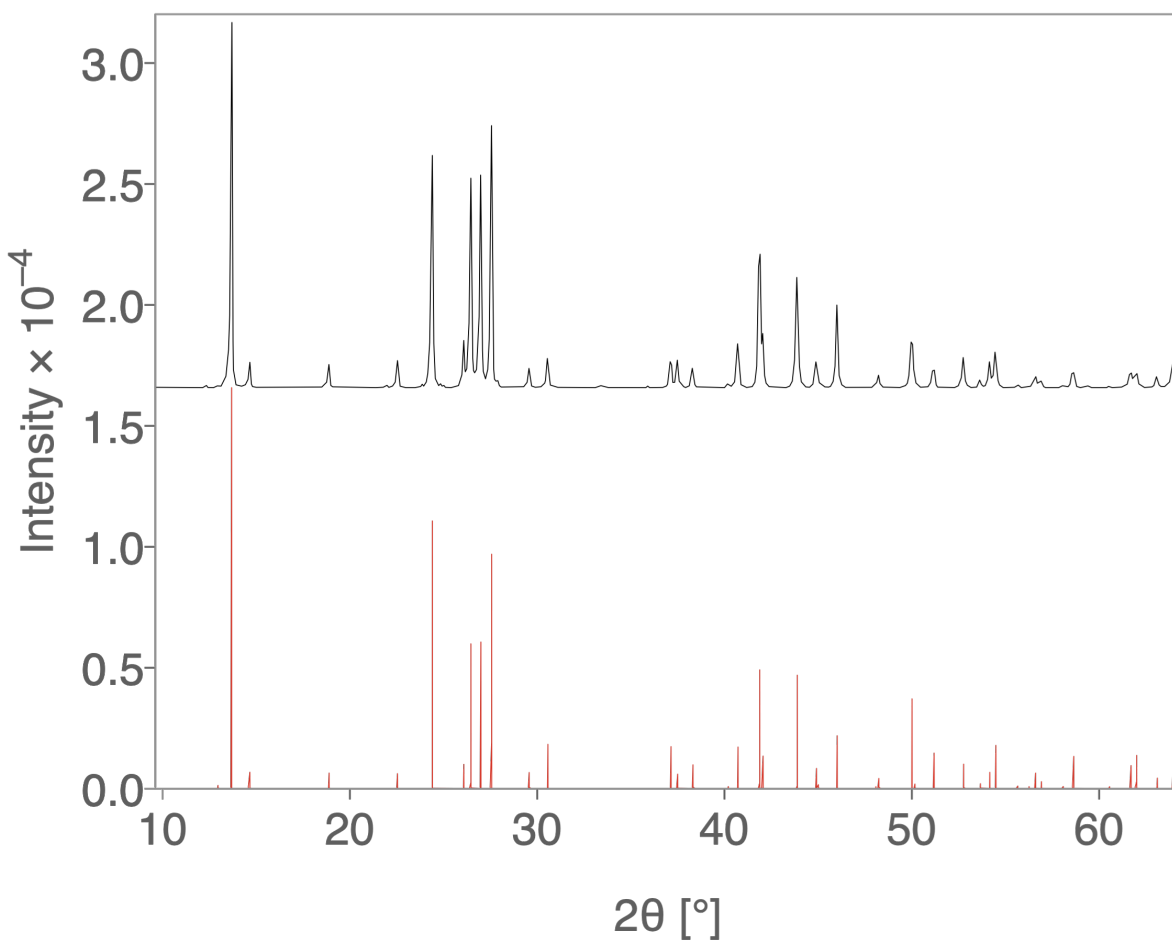

Figure S2. Experimental and calculated powder patterns of  $\text{Cs}_2\text{CoCe}_3\text{F}_{16}$  indicated by the black and red lines respectively. The preferred orientation effects (plate-like crystal morphology along (001) planes) were taken into account for the calculated pattern to bring the intensities on the same scale. The refined unit cell parameters from PXRD are  $a = 7.887(3)$ ,  $c = 12.924(2)$  Å and agree well with the parameters from single crystal X-ray diffraction,  $a = 7.8823(2)$ ,  $c = 12.9303(3)$  Å.

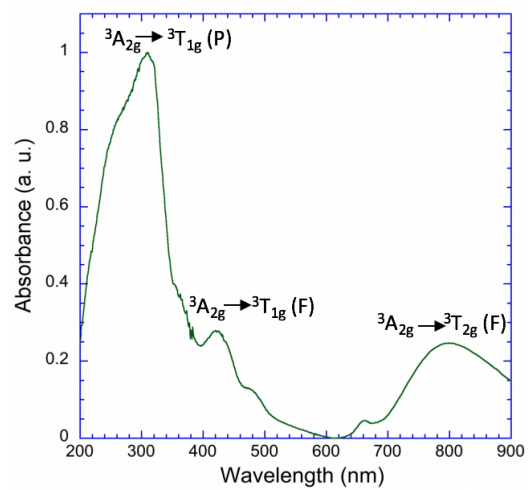

(a)

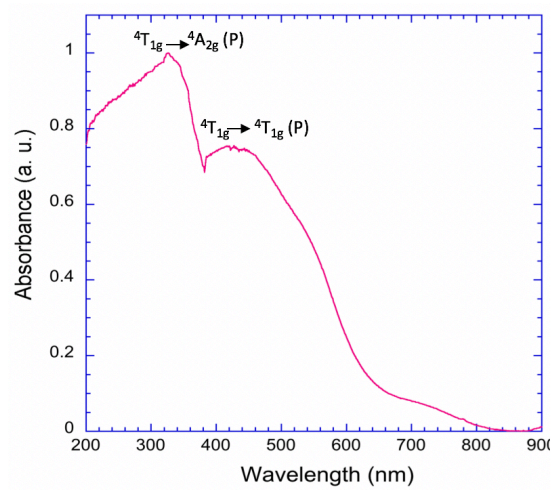

(b)

Figure S3. UV-Vis diffuse absorbance spectra of (a)  $\text{Cs}_2\text{NiCe}_3\text{F}_{16}$  and (b)  $\text{Cs}_2\text{CoCe}_3\text{F}_{16}$ .

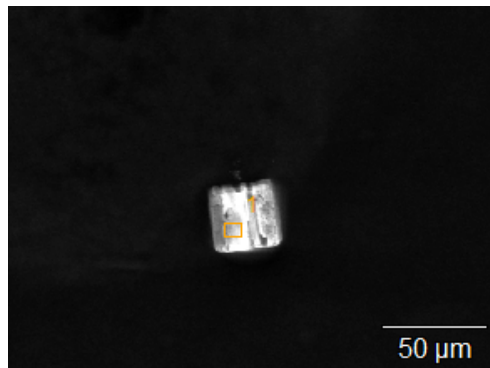

(a)

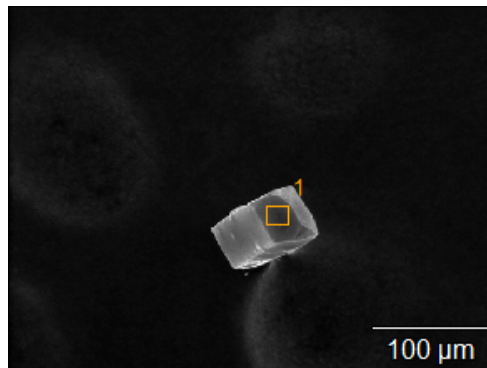

(b)

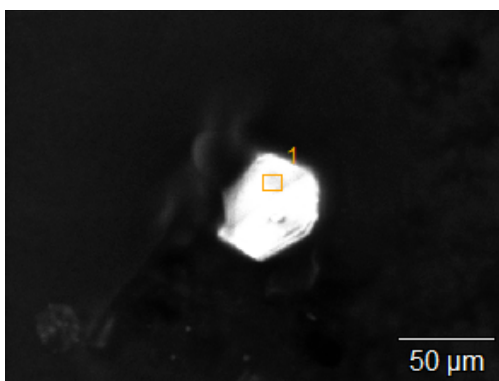

(c)

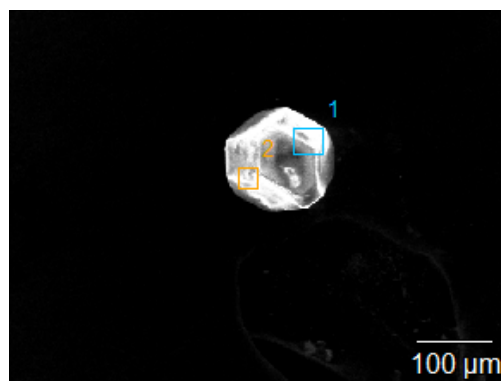

(d)

Figure S4. SEM images of crystals of  $\text{Cs}_2\text{NiCe}_3\text{F}_{16}$  (a),  $\text{Cs}_2\text{CoCe}_3\text{F}_{16}$  (b),  $\text{Cs}_2\text{MnCe}_3\text{F}_{16}$  (c), and  $\text{Cs}_2\text{ZnCe}_3\text{F}_{16}$  (d).

Table S1. Elemental composition determined by EDS for  $\text{Cs}_2\text{MCe}_3\text{F}_{16}$  (M= Ni, Co, Mn, and Zn)

| $\text{Cs}_2\text{NiCe}_3\text{F}_{16}$ |        | $\text{Cs}_2\text{CoCe}_3\text{F}_{16}$ |        | $\text{Cs}_2\text{MnCe}_3\text{F}_{16}$ |        | $\text{Cs}_2\text{ZnCe}_3\text{F}_{16}$ |        |
|-----------------------------------------|--------|-----------------------------------------|--------|-----------------------------------------|--------|-----------------------------------------|--------|
| Element                                 | Atom % |
| Cs                                      | 13.64  | Cs                                      | 10.66  | Cs                                      | 13.10  | Cs                                      | 8.88   |
| Ce                                      | 21.70  | Ce                                      | 16.45  | Ce                                      | 19.04  | Ce                                      | 13.57  |
| Ni                                      | 4.51   | Co                                      | 3.86   | Mn                                      | 5.11   | Zn                                      | 4.10   |
| F                                       | 60.15  | F                                       | 69.03  | F                                       | 62.76  | F                                       | 73.45  |

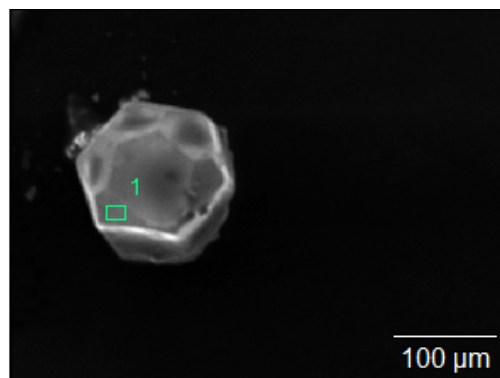

(a)

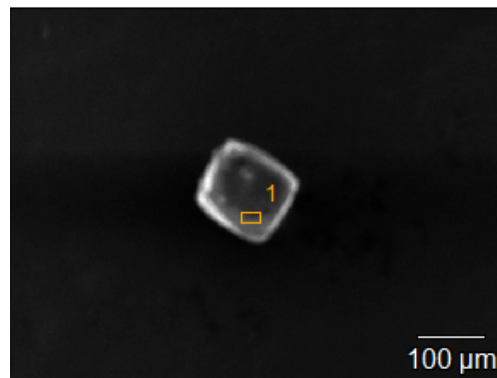

(b)

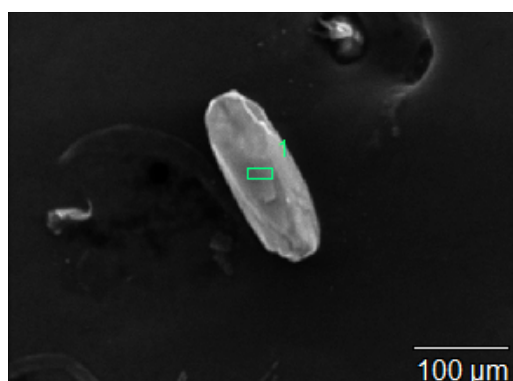

(c)

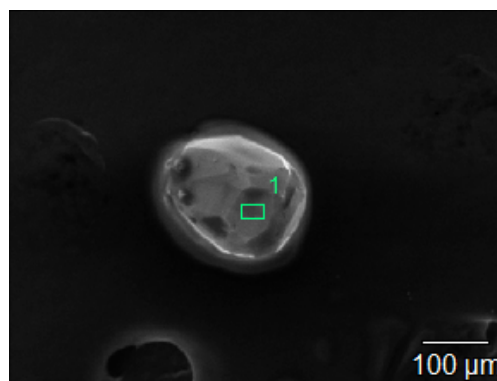

(d)

Figure S4. SEM images of crystals of  $\text{Na}_3\text{AlCe}_6\text{F}_{30}$  (a),  $\text{Na}_3\text{GaCe}_6\text{F}_{30}$  (b),  $\text{Na}_3\text{CrCe}_6\text{F}_{30}$  (c), and  $\text{Na}_3\text{FeCe}_6\text{F}_{30}$  (d)

Table S2. Elemental composition determined by EDS for  $\text{Na}_3\text{M}\text{Ce}_6\text{F}_{30}$  (M = Al, Ga, Fe, and Cr)

| $\text{Na}_3\text{AlCe}_6\text{F}_{30}$ |        | $\text{Na}_3\text{GaCe}_6\text{F}_{30}$ |        | $\text{Na}_3\text{FeCe}_6\text{F}_{30}$ |        | $\text{Na}_3\text{CrCe}_6\text{F}_{30}$ |        |
|-----------------------------------------|--------|-----------------------------------------|--------|-----------------------------------------|--------|-----------------------------------------|--------|
| Element                                 | Atom % |
| Na                                      | 9.84   | Na                                      | 9.88   | Na                                      | 11.89  | Na                                      | 12.26  |
| Ce                                      | 11.02  | Ce                                      | 14.43  | Ce                                      | 17.40  | Ce                                      | 17.19  |
| Al                                      | 2.95   | Ga                                      | 2.04   | Fe                                      | 2.58   | Cr                                      | 2.37   |
| F                                       | 76.19  | F                                       | 73.65  | F                                       | 68.13  | F                                       | 68.18  |
